# Supplementary material
Source: PubMed Central journal article supplement (PMC7339119)
Supplement: NIHMS1588754-supplement-Supplemental_Figures.pdf [file NIHMS1588754-supplement-Supplemental_Figures.pdf]

## SUPPLEMENTARY FIGURES FOR THE PUBLICATION:

*Spatiotemporal proteomics reveals the molecular consequences of hormone treatment in a mouse model of lower urinary tract dysfunction*

Samuel Thomas<sup>1,#</sup>, Ling Hao<sup>2,#</sup>, Kellen DeLaney<sup>3</sup>, Dalton McLean<sup>4</sup>, Laura Steinke<sup>2</sup>, Paul C. Marker<sup>2</sup>, Chad M. Vezina<sup>1,5,6</sup>, Lingjun Li<sup>1,2,3,\*</sup>, and William A. Ricke<sup>1,2,4,5,\*</sup>

<sup>1</sup>Molecular and Environmental Toxicology Center, University of Wisconsin-Madison, Madison, WI, USA

<sup>2</sup>School of Pharmacy, University of Wisconsin-Madison, Madison, WI, USA

<sup>3</sup>Department of Chemistry, University of Wisconsin-Madison, Madison, WI, USA

<sup>4</sup>Department of Urology, University of Wisconsin-Madison, Madison, WI, USA

<sup>5</sup>George M. O'Brien Center of Research Excellence, University of Wisconsin-Madison, Madison, WI, USA

<sup>6</sup>School of Veterinary Medicine, University of Wisconsin-Madison, Madison, WI, USA

#These authors contributed equally to this work.

\*Corresponding authors contributed equally to this work.

## Supplemental material

In this document:

Figure S-1. Temporal urinary proteomics of hormone treatment in mice: significantly modulated urine proteins related to acute phase and xenobiotic responses

Figure S-2. Temporal urinary proteomics of hormone treatment in mice: significantly modulated urine proteins related to immunologic processes

Figure S-3. Temporal urinary proteomics of hormone treatment in mice: significantly modulated urine proteins related to blood and iron

Figure S-5. Full gene ontology network of mouse prostate proteomics (from Fig. 4B)

Figure S-6. Significantly enriched biological processes in a prior analysis of human patients with lower urinary tract symptoms ( $n=25$  patients vs  $n=15$  controls)

Elsewhere:

Figure S-4. Three-dimensional animation of microcomputed tomography experiment in A: one untreated mouse and B: one hormone-treated mouse at 4 weeks

Table S-1. Full list of urine proteins across time (with iBAQ intensity and RM-ANOVA/Tukey's results)

Table S-2. Full list of prostate tissue proteins at 8 weeks (with iBAQ intensity)

Table S-3. Significantly modulated prostate proteins (Perseus volcano results)

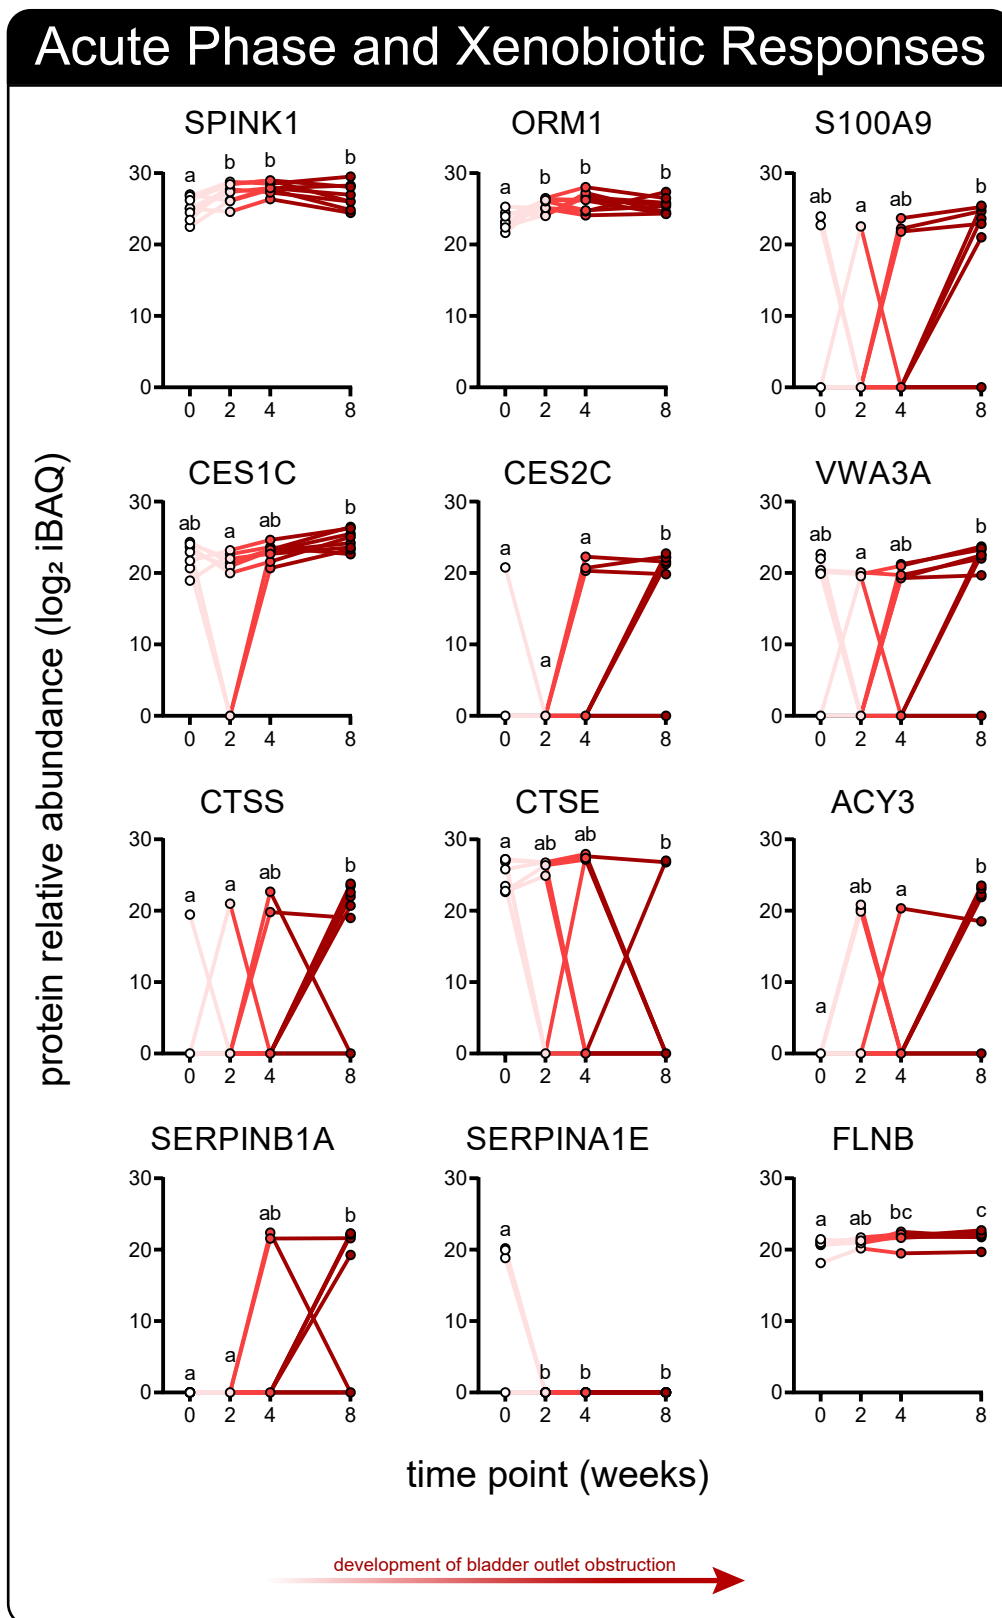

Figure S-1. A subset of significantly modulated urine proteins are related to the acute phase and xenobiotic responses; protein relative abundance (LFQ iBAQ) across 4 time points of disease progression. Distinct letters denote groups with significant differences ( $n = 8$ ; RM-ANOVA, Tukey's post-hoc test,  $\alpha = 0.05$ ).

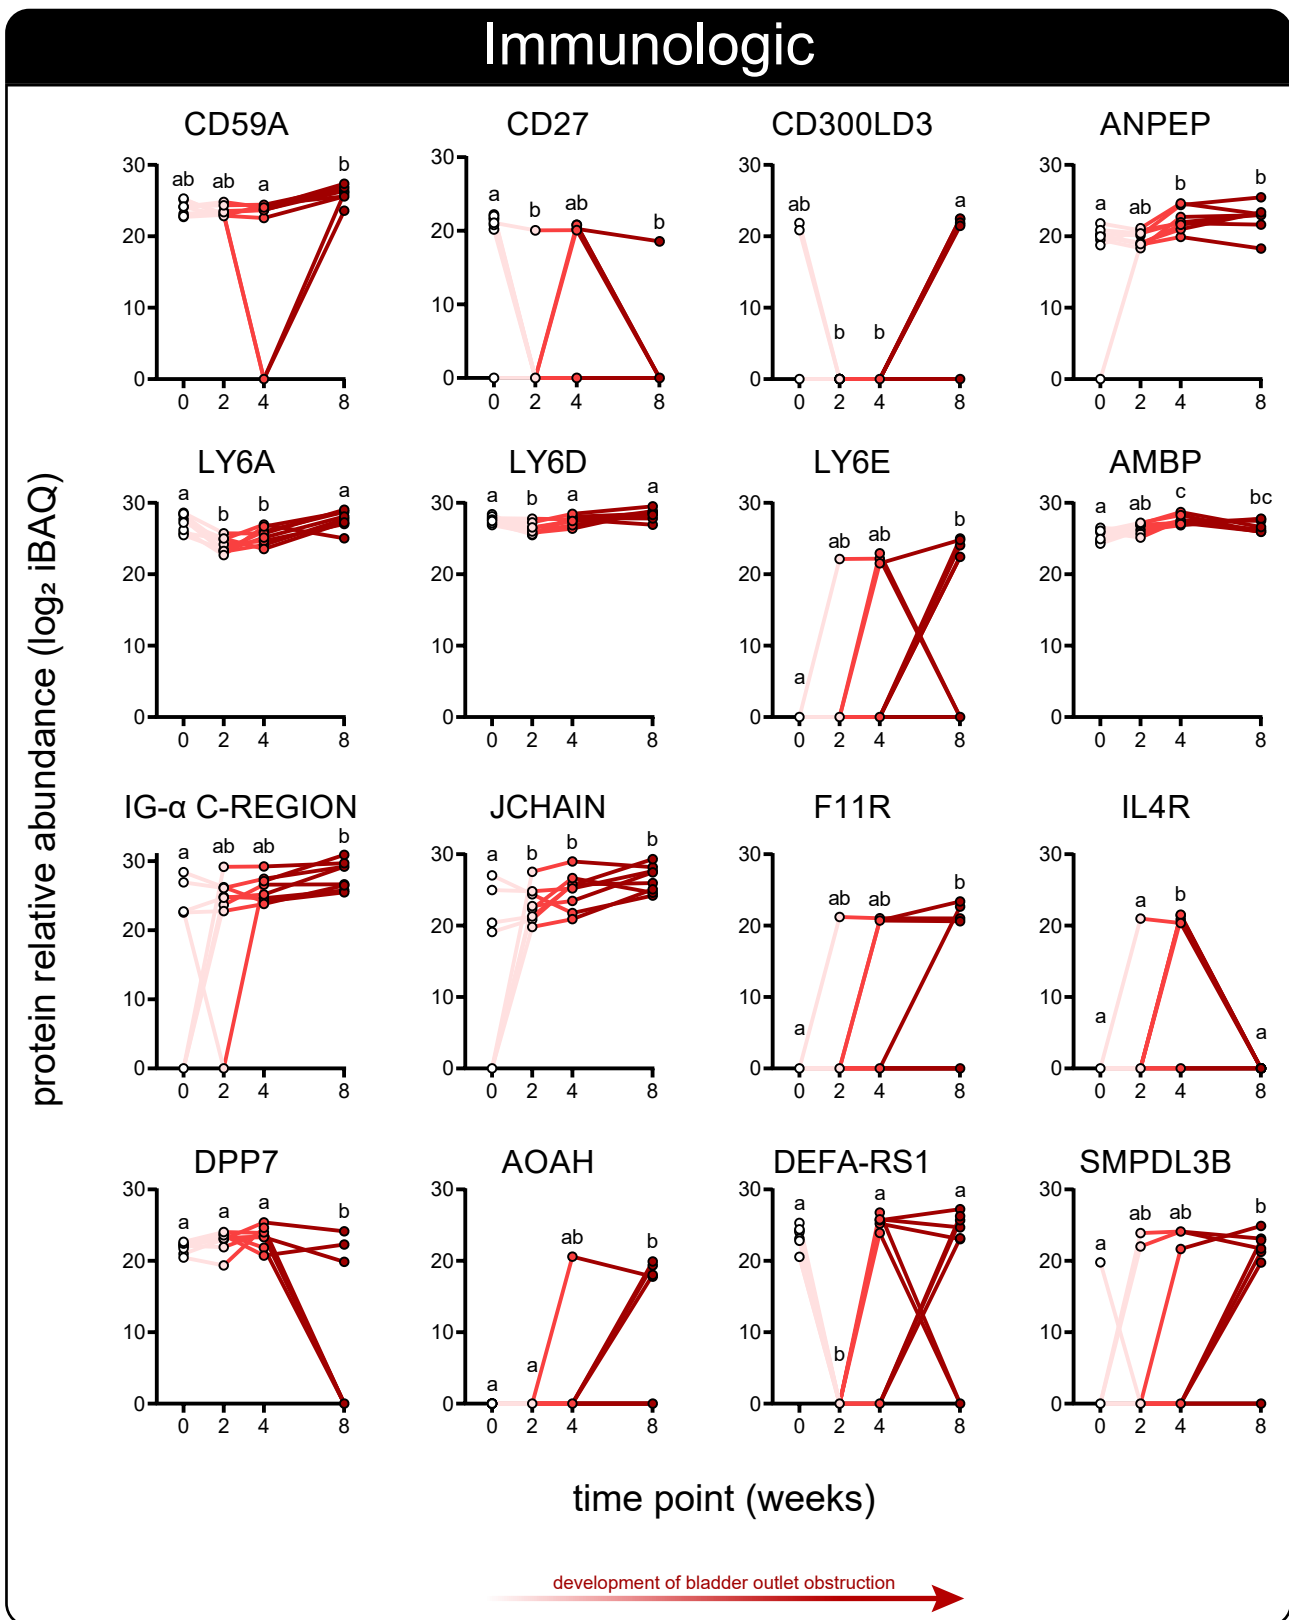

Figure S-2. A subset of significantly modulated urine proteins are related to immunologic processes; protein relative abundance (LFQ iBAQ) across 4 time points of disease progression. Distinct letters denote groups with significant differences ( $n = 8$ ; RM-ANOVA, Tukey's post-hoc test,  $\alpha = 0.05$ ).

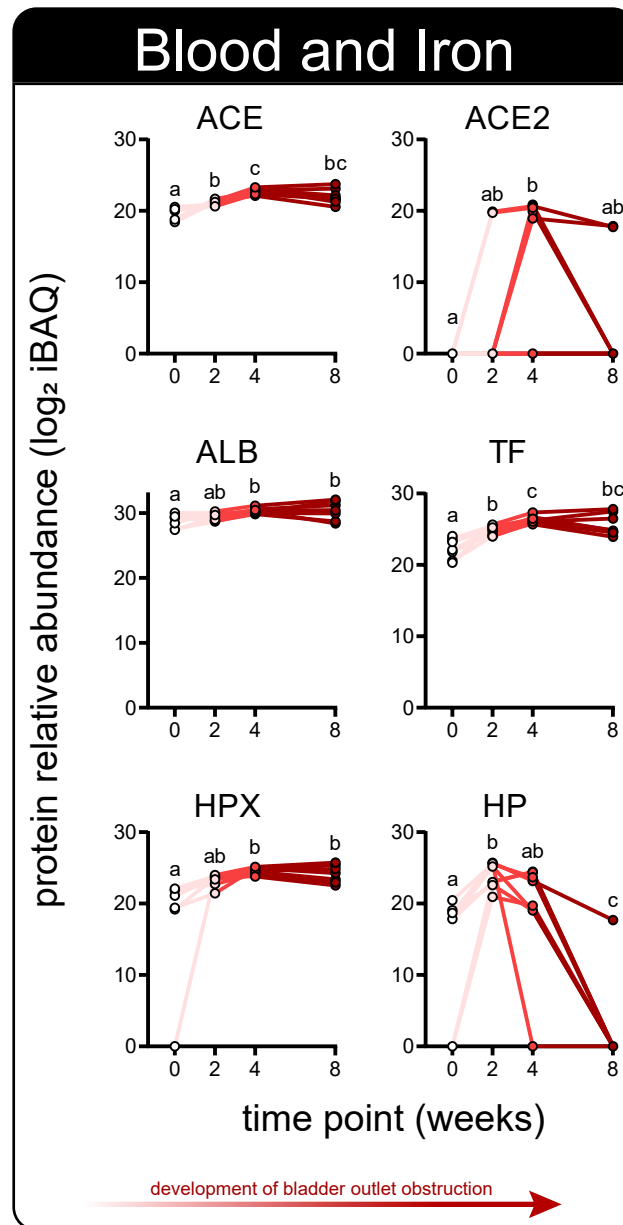

Figure S-3. A subset of significantly modulated urine proteins are related to blood and iron homeostasis; protein relative abundance (LFQ iBAQ) across 4 time points of disease progression. Distinct letters denote groups with significant differences ( $n = 8$ ; RM-ANOVA, Tukey's post-hoc test,  $\alpha = 0.05$ ).

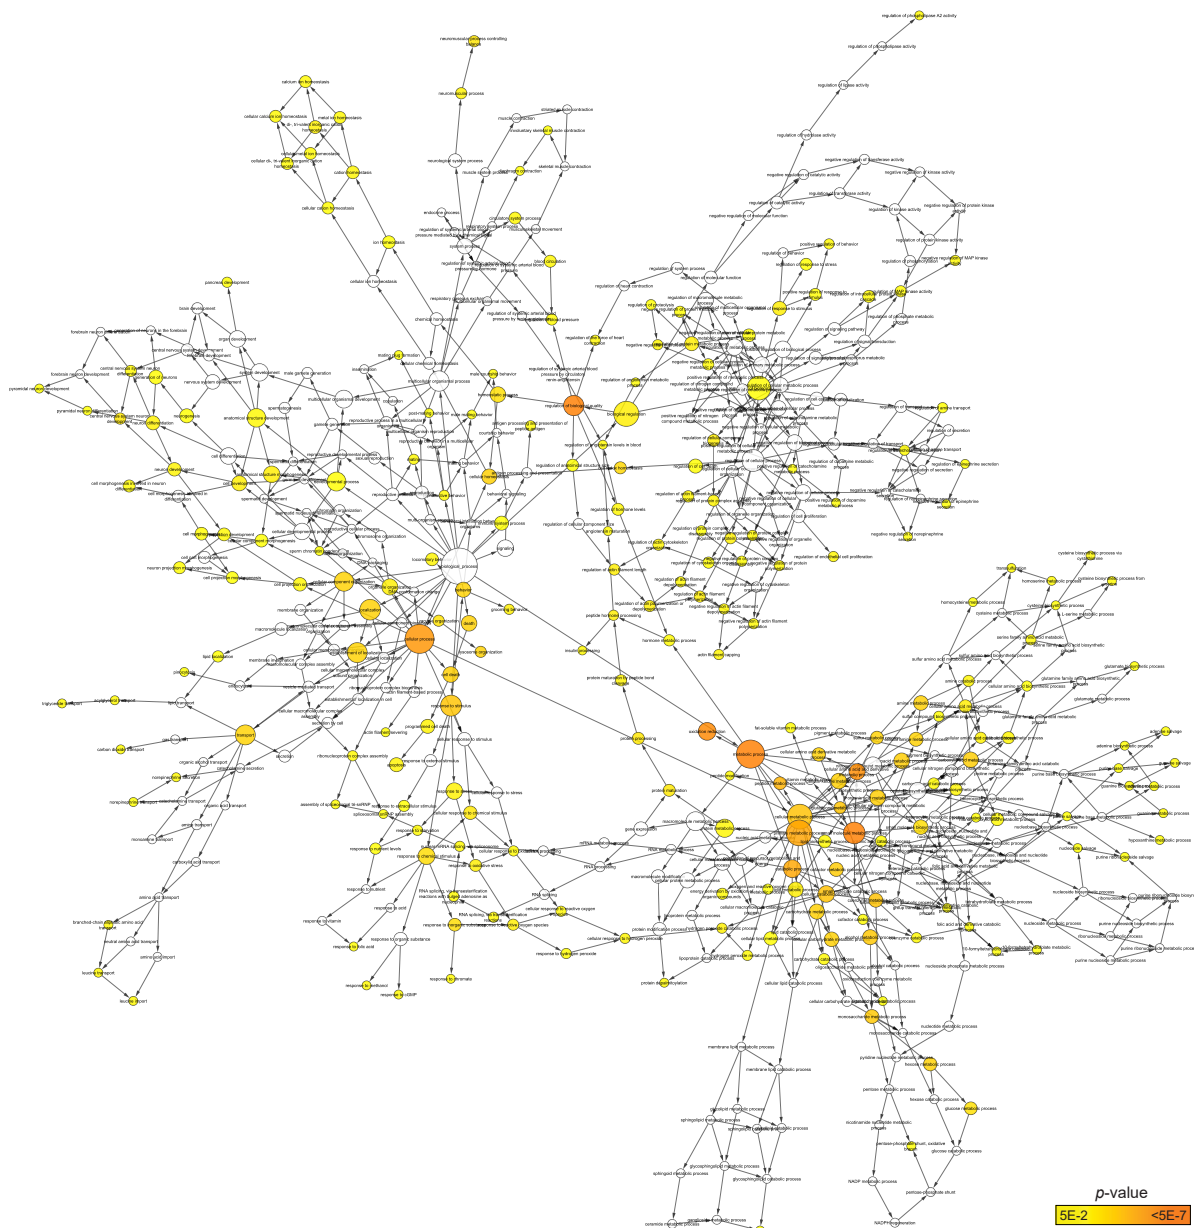

Figure S-5. Full gene ontology network of mouse prostate proteomics (from Fig. 5B): significantly enriched biological processes (Hypergeometric test with Benjamini & Hochberg FDR correction; Cytoscape BiNGO tool).

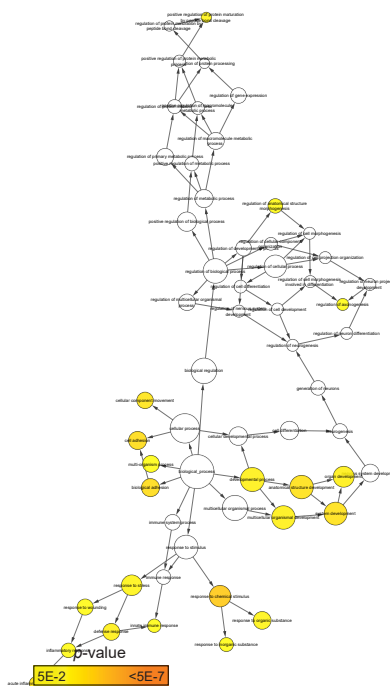

Figure S-6. Significantly enriched biological processes in a prior analysis of human patients with lower urinary tract symptoms ( $n = 25$  patients vs  $n = 15$  controls). Note similar processes: response to stress, etc. (from DOI: 10.1371/journal.pone.0135415.s004; Hypergeometric test with Benjamini & Hochberg FDR correction; Cytoscape BiNGO tool).
